# Supplementary material for: Meta-GWAS Accuracy and Power (MetaGAP) Calculator Shows that Hiding Heritability Is Partially Due to Imperfect Genetic Correlations across Studies
Source: PubMed Central journal article supplement (PMC5240919; doi:10.1371/journal.pgen.1006495), 2017-01-17
Supplement: pgen.1006495.s003.pdf [file pgen.1006495.s003.pdf]

## S1 Note. Genetic correlations.

Consider, without loss of generality, a model for two phenotypes,  $Y_1$  and  $Y_2$ . Similar to S2 Derivations, we treat phenotypes, genotypes, and SNP effects as random variables. In line with Assumption 5 in S1 Derivations, let each causal variant, for the phenotype of interest, have the same  $R^2$  with respect to that phenotype.

We can write the data-generating processes of the respective phenotypes as

$$Y_1 = \sum_{k \in \mathcal{M}_1} X_{k,1} \beta_{k,1} + \varepsilon_1 \text{ and}$$

$$Y_2 = \sum_{p \in \mathcal{M}_2} X_{p,2} \beta_{p,2} + \varepsilon_2,$$

where  $\mathcal{M}_1$  (resp.  $\mathcal{M}_2$ ) denotes the set of causal SNPs for  $Y_1$  ( $Y_2$ ) and where  $\beta_{k,1}$  (resp.  $\beta_{p,2}$ ) the effect of  $X_{k,1}$  ( $X_{p,2}$ ), that is, standardized SNP  $k$  ( $p$ ), on phenotype 1 (2).

The genetic correlation at the genome-wide level can now be conceptualized as the correlation in the true genetic value for both phenotypes. That is

$$\begin{aligned} \rho_{\mathbf{G}} &= \text{Corr} \left( \sum_{k \in \mathcal{M}_1} X_{k,1} \beta_{k,1}, \sum_{p \in \mathcal{M}_2} X_{p,2} \beta_{p,2} \right) \\ &= \frac{\text{Cov} \left( \sum_{k \in \mathcal{M}_1} X_{k,1} \beta_{k,1}, \sum_{p \in \mathcal{M}_2} X_{p,2} \beta_{p,2} \right)}{\sqrt{\text{Var} \left( \sum_{k \in \mathcal{M}_1} X_{k,1} \beta_{k,1} \right) \text{Var} \left( \sum_{p \in \mathcal{M}_2} X_{p,2} \beta_{p,2} \right)}} \end{aligned}$$

Assuming independent haplotype blocks with independent effects (Assumption 4 in S1 Derivations), where the effects have mean zero, this expression for the genetic correlation at the genome-wide level can be rewritten as

$$\begin{aligned} \rho_{\mathbf{G}} &= \frac{\sum_{k \in \{\mathcal{M}_1 \cap \mathcal{M}_2\}} \mathbb{E} [\beta_{k,1} \beta_{k,2}]}{\sqrt{|\mathcal{M}_1| \sigma_{\beta_1}^2 |\mathcal{M}_2| \sigma_{\beta_2}^2}} \\ &= \frac{|\mathcal{M}_1 \cap \mathcal{M}_2|}{\sqrt{|\mathcal{M}_1| |\mathcal{M}_2|}} \frac{\sigma_{\beta_{1,2}}}{\sqrt{\sigma_{\beta_1}^2 \sigma_{\beta_2}^2}}, \end{aligned}$$

where  $|\mathcal{A}|$  denotes the number of elements in set  $\mathcal{A}$ .

Hence, the genetic correlation at the genome-wide level can be written as the product of overlap in causal loci between the two traits and the cross-trait correlation of the effects of these overlapping loci. That is,

$$\rho_{\mathbf{G}} = \frac{|\mathcal{M}_1 \cap \mathcal{M}_2|}{\sqrt{|\mathcal{M}_1| |\mathcal{M}_2|}} \rho_{\beta}. \quad (1)$$

Eq. 1 is a generalization of the ‘common-elements formula’ [1], describing a correlation as a function of the number

of overlapping elements and unique elements.

In particular, when  $|\mathcal{M}_1| = |\mathcal{M}_2|$ , we have that

$$\rho_{\mathbf{G}} = \frac{O}{O + D} \rho_{\beta},$$

where  $O$  denotes the number of overlapping causal loci and  $D$  the number of idiosyncratic causal loci per trait.

We assume throughout the paper that all causal loci are shared across traits and studies (Assumption 3 in S1 Derivations). That is,

$$\frac{|\mathcal{M}_1 \cap \mathcal{M}_2|}{\sqrt{|\mathcal{M}_1| |\mathcal{M}_2|}} = 1,$$

and that, consequently, the genetic correlation at the genome-wide level is equal to the correlation in the effects of overlapping causal SNPs. That is,

$$\rho_{\mathbf{G}} = \rho_{\beta}.$$

As we show in S1 Simulations, the theoretical predictions of GWAS power and predictive accuracy obtained under this assumption are quite accurate, even when an imperfect genetic correlation at the genome-wide level is shaped primarily by lack of overlap in causal loci, rather than a poor correlation in the effects of overlapping loci.

## References

1. Jensen AR. Note on why genetic correlations are not squared. *Psychol Bull.* 1971;75:223–224.
