# Supplementary material for: Meta-GWAS Accuracy and Power (MetaGAP) Calculator Shows that Hiding Heritability Is Partially Due to Imperfect Genetic Correlations across Studies
Source: PubMed Central journal article supplement (PMC5240919; doi:10.1371/journal.pgen.1006495), 2017-01-17
Supplement: pgen.1006495.s007.pdf [file pgen.1006495.s007.pdf]

**S1 Table. GREML estimates of SNP heritability and genetic correlation across studies.**

| Phenotype            | N     |       |       |        | Univariate estimates SNP heritability <sup>1</sup> |       |       |                      | Bivariate estimates genetic correlation <sup>1,2</sup> |        |         |                      |
|----------------------|-------|-------|-------|--------|----------------------------------------------------|-------|-------|----------------------|--------------------------------------------------------|--------|---------|----------------------|
|                      | RS    | STR   | HRS   | Total  | RS                                                 | STR   | HRS   | Average <sup>3</sup> | RS-STR                                                 | RS-HRS | STR-HRS | Average <sup>4</sup> |
| Height               | 6,780 | 5,342 | 8,336 | 20,458 | 48.9%                                              | 50.8% | 37.9% | 44.9%                | 0.976                                                  | 0.954  | 0.967   | 0.965                |
| BMI                  | 6,775 | 5,341 | 8,333 | 20,449 | 28.9%                                              | 16.4% | 19.6% | 21.9%                | 1.000                                                  | 0.914  | 0.847   | 0.917                |
| <i>EduYears</i>      | 6,735 | 5,543 | 8,341 | 20,619 | 17.5%                                              | 20.6% | 17.3% | 18.2%                | 0.690                                                  | 0.659  | 1.000   | 0.783                |
| <i>CurrCigt</i>      | 6,803 | 5,579 | 8,304 | 20,686 | 17.8%                                              | 18.7% | 20.4% | 19.1%                | 1.000                                                  | 0.611  | 1.000   | 0.858                |
| <i>CurrDrinkFreq</i> | 6,172 | 5,564 | 8,336 | 20,072 | 13.5%                                              | 14.1% | 5.3%  | 10.3%                | 1.000                                                  | 0.298  | -0.056  | 0.381                |
| Self-rated health    | 5,264 | 5,577 | 8,343 | 19,184 | 13.5%                                              | 9.4%  | 21.3% | 15.7%                | 0.626                                                  | 0.363  | 0.447   | 0.468                |

<sup>1</sup> Standard errors between parentheses.

<sup>2</sup> Significance of deviations from one only tested for genetic correlations.

<sup>3</sup> Sample-size weighted averages of univariate estimates across studies.

<sup>4</sup> Sample-size weighted averages of bivariate estimates across pairs of studies.

\* > 0 at 10% sign.  
 † < 1 at 10% sign.  
 \*\* > 0 at 5% sign.  
 †† < 1 at 5% sign.  
 \*\*\* > 0 at 1% sign.  
 ††† < 1 at 1% sign.
