# Supplementary material for: Meta-GWAS Accuracy and Power (MetaGAP) Calculator Shows that Hiding Heritability Is Partially Due to Imperfect Genetic Correlations across Studies
Source: PubMed Central journal article supplement (PMC5240919; doi:10.1371/journal.pgen.1006495), 2017-01-17
Supplement: pgen.1006495.s008.pdf [file pgen.1006495.s008.pdf]

**S2 Table. GREML estimates of SNP heritability and genetic correlation across sexes.**

| Phenotype            | N       |       |        | Univariate estimates SNP heritability <sup>1</sup> |                  |                      | Bivariate estimates genetic correlation <sup>1,2</sup> |  |
|----------------------|---------|-------|--------|----------------------------------------------------|------------------|----------------------|--------------------------------------------------------|--|
|                      | Females | Males | Total  | Females                                            | Males            | Average <sup>3</sup> | Females–Males                                          |  |
| Height               | 11,553  | 8,905 | 20,458 | 43.2% (3.0%) ***                                   | 45.1% (3.8%) *** | 44.0%                | 0.981 (0.067) ***                                      |  |
| BMI                  | 11,542  | 8,907 | 20,449 | 22.1% (2.9%) ***                                   | 23.8% (3.8%) *** | 22.8%                | 0.794 (0.122) *** †                                    |  |
| <i>EduYears</i>      | 11,653  | 8,966 | 20,619 | 18.1% (2.9%) ***                                   | 18.9% (3.7%) *** | 18.4%                | 0.832 (0.162) ***                                      |  |
| <i>CurrCigt</i>      | 11,706  | 8,980 | 20,686 | 22.3% (7.1%) ***                                   | 26.7% (9.1%) *** | 24.2%                | 0.543 (0.257) *** †                                    |  |
| <i>CurrDrinkFreq</i> | 11,312  | 8,760 | 20,072 | 14.1% (4.6%) ***                                   | 0.9% (6.0%)      | 8.3%                 | 1.000 (2.068) *                                        |  |
| Self-rated health    | 10,866  | 8,318 | 19,184 | 8.6% (3.1%) ***                                    | 10.8% (4.0%) *** | 9.5%                 | 1.000 (0.349) ***                                      |  |

<sup>1</sup> Standard errors between parentheses.

<sup>2</sup> Significance of deviations from one only tested for genetic correlations.

<sup>3</sup> Sample-size weighted averages of univariate estimates in females and males.

\* > 0 at 10% sign.

\*\* > 0 at 5% sign.

\*\*\* > 0 at 1% sign.

† < 1 at 10% sign.

†† < 1 at 5% sign.

††† < 1 at 1% sign.
