# Supplementary material for: Meta-GWAS Accuracy and Power (MetaGAP) Calculator Shows that Hiding Heritability Is Partially Due to Imperfect Genetic Correlations across Studies
Source: PubMed Central journal article supplement (PMC5240919; doi:10.1371/journal.pgen.1006495), 2017-01-17
Supplement: pgen.1006495.s009.pdf [file pgen.1006495.s009.pdf]

**S3 Table. Details and notes on the sources for the sample size, the number of meta-analyzed studies, the number of genome-wide significant hits, and the PGS  $R^2$ , for large-scale GWAS efforts to date for height, BMI, *Edu Years*, and self-rated health, reported in the same order as in Table 2.**

| Study                              | N        |      |         | C*       |       |            | Number of hits |      |               | PGS $R^2$               |      |                                                    |
|------------------------------------|----------|------|---------|----------|-------|------------|----------------|------|---------------|-------------------------|------|----------------------------------------------------|
|                                    | Section  | Page | Note    | Section  | Page  | Note       | Section        | Page | Note          | Section                 | Page | Note                                               |
| Wood <i>et al.</i> (2014) [1]      | Abstract | 1173 |         | Results  | 1173  |            | Abstract       | 1173 |               | Figure 2d               | 1175 | Approximation least stringent $p$ -value threshold |
| Allen <i>et al.</i> (2010) [2]     | Abstract | 832  |         | SI       | 2     | Stages 1–2 | Abstract       | 832  |               | Figure 1a               | 833  | Approximation least stringent $p$ -value threshold |
| Weedon <i>et al.</i> (2008) [3]    | Abstract | 575  |         | Results  | 576   |            | Table 1        | 577  |               | Results                 | 580  | PGS based on 20 SNPs                               |
| Locke <i>et al.</i> (2015) [4]     | Abstract | 197  |         | Results  | 197   |            | Abstract       | 197  |               | Extended Data Figure 3c |      | Approximation                                      |
| Speliotes <i>et al.</i> (2010) [5] | Abstract | 937  |         | Results  | 937   |            | Results        | 937  |               | Results                 | 941  | Least stringent $p$ -value threshold               |
| Willer <i>et al.</i> (2008) [6]    | Results  | 26   | Stage 1 | Results  | 26    | Stage 1    | Results        | 26   | Stage 1       | <i>n.a.</i>             |      |                                                    |
| Okbay <i>et al.</i> (2016) [7]     | SI       | 16   |         | SI       | 12,16 |            | SI             | 16   |               | <i>n.a.</i>             |      |                                                    |
| Okbay <i>et al.</i> (2016) [7]     | Abstract | 539  |         | SI       | 12    |            | Abstract       | 539  |               | SI                      | 108  |                                                    |
| Rietveld <i>et al.</i> (2013) [8]  | Abstract | 1467 |         | Results  | 1467  |            | Results        | 1467 | EduYears hits | Results                 | 1469 | Approximation average                              |
| Harris <i>et al.</i> (2016) [9]    | Abstract | 1    |         | Abstract | 1     |            | Abstract       | 1    |               | <i>n.a.</i>             |      |                                                    |

\*C denotes the number of studies in the meta-analysis; C is slightly subjective (e.g., RS I, II, and III can be considered as one study or as three).

## References

1. Wood AR, Esko T, Yang J, Vedantam S, Pers TH, Gustafsson S, et al. Defining the role of common variation in the genomic and biological architecture of adult human height. *Nat Genet.* 2014;46:1173–1186.
2. Lango Allen H, Estrada K, Lettre G, Berndt SI, Weedon MN, Rivadeneira F, et al. Hundreds of variants clustered in genomic loci and biological pathways affect human height. *Nature.* 2010;467:832–838.
3. Weedon MN, Lango Allen H, Lindgren CM, Wallace C, Evans DM, Mangino M, et al. Genome-wide association analysis identifies 20 loci that influence adult height. *Nat Genet.* 2008;40:575–583.
4. Locke AE, Kahali B, Berndt SI, Justice AE, Pers TH, Day FR, et al. Genetic studies of body mass index yield new insights for obesity biology. *Nature.* 2015;518:197–206.
5. Speliotes EK, Willer CJ, Berndt SI, Monda KL, Thorleifsson G, Jackson AU, et al. Association analyses of 249,796 individuals reveal 18 new loci associated with body mass index. *Nat Genet.* 2010;42:937–948.
6. Willer CJ, Speliotes EK, Loos RJJ, Li S, Lindgren CM, Heid IM, et al. Six new loci associated with body mass index highlight a neuronal influence on body weight regulation. *Nat Genet.* 2008;41:25–34.
7. Okbay A, Beauchamp JP, Fontana MA, Lee JJ, Pers TH, Rietveld CA, et al. Genome-wide association study identifies 74 loci associated with educational attainment. *Nature.* 2016;533:539–542.
8. Rietveld CA, Medland SE, Derringer J, Yang J, Esko T, Martin NW, et al. GWAS of 126,559 individuals identifies genetic variants associated with educational attainment. *Science.* 2013;340:1467–1471.
9. Harris SE, Hagenaars SP, Davies G, Hill WD, Liewald DCM, Ritchie SJ, et al. Molecular genetic contributions to self-rated health. *Int J Epidemiol.* 2016;advance access:dyw219.
